# Supplementary material for: Locus-resolution analysis of L1 regulation and retrotransposition potential in mouse embryonic development
Source: Genome Res. 2023 Sep;33(9):1465–81. doi: 10.1101/gr.278003.123 (PMC10620060; doi:10.1101/gr.278003.123)
Supplement: Supplement 15 [file Supplemental_Table_S1.xlsx]

## Sheet: README
Tab 1: Primers used to amplify Donor and Daughter insertions from genomic DNA. The target L1 name, forward primer sequence and melting temperature (Tm), and reverse primer sequence and melting temperature are listed. The annealing temperatures used in PCR reactions are listed for each target.
Tab 2: Primers for sequencing full-length L1 clones. The primer name and primer sequence are listed.
Tab 3: Primers for bisulfite sequencing of L1 subfamily monomers and individual L1 loci. The target name, forward primer and melting temperature (Tm), and reverse primer and melting temperature are listed. The annealing temperatures used in PCR reactions are listed for each target.
Tab 4: Bisulfite sequencing amplicons. The target name, unconverted amplicon sequence, and amplicon length excluding primers are listed.
Tab 5: PromethION sequencing statistics. The PromethION sequencing statistics for samples from three mESC differentiation time points (mESCs_d0, EBs_d3 and differentiated_d21) are listed. The sample type, sample name, sample ID, flowcell ID, yield (in Gbp) and N50 (in Kbp) are shown.
Tab 6: Consensus sequences for L1 TF elements with 5, 4, 3, or 2 monomers used in ONT methylation analyses and 5? RACE analyses are shown.

## Sheet: Cloning primers
Target	Forward primer sequence (5ʹ to 3ʹ)	Tm (˚C)	Reverse primer sequence (5ʹ to 3ʹ)	Tm (˚C)	Annealing temperature (˚C)
Insertion_2_FL	cttgcggccgcctattaaaaatttttttctctcggctg	60.8	gacacacatatgcatgcattcc	60.1	60/58*
Insertion_5_FL	cttgcggccgcgtagacaagaaaataacagcggg	60.9	ctgtttcactctgaatgactgc	60.1	60/58*
Insertion_7_FL	cttgcggccgccatggtctaaaagaatatgcaagtt	59.2	ttccagcttctggctattgttttttt	61.7	60/58*
polyL1Tf_3_FL	cttgcggccgccataataagatgacagactcgaca	60.3	tcaccgtgctgagaagttaca	59.5	60/58*
polyL1Tf_4_FL	cttgcggccgcggatatagttgaaaaagaaaatacagatc	62.1	aaccccagtgttattttctgattc	60.3	60/58*
Donor_2_FL	cttgcggccgcgtggagttggttgcttggat	58.4	aagaacaggctgggttctga	58.4	58/56*
Donor_5_FL	cttgcggccgcggattagaactttttatcagatct	56.6	aaccttcccaccttctggtt	58.4	58/56*
Donor_7_FL	cttgcggccgcagatctcactcacgtgccaat	59.5	ctgggttgtcatcttgttcttt	58.4	60/58*
Donor_3_FL	cttgcggccgcggagagaaacagggtcaaagtg	62.1	ctgtactgggtcccaaggaa	60.5	60/58*
Donor_4_FL	cttgcggccgcgtgtaaaataaaaaatgtcgaggtg	59.2	ccaccctctccattttgtgt	58.4	58/56*
pCEP4_Donor_3_prom	atagcggccgccttacaaatgcaacagttggag	58.4	gggaactgccaaagcaacac	60.5	58**
L1_3ʹUTR + SbfI-site	tctggtggaatcaccatgcc	60.5	atacctgcaggtacatatgcagctagagtcaaga	59.2	58**
pCEP4_L1_G4_region	ataggatccaccggttcaaaagatggcctagtcggc	61.2	tatggatccttaattaatgctataccaaaagtccc	51.4	58/56*
Insertion_2_YY1_fix	cttgcggccgcctattaaaaatttttttctctcggctg	75.8	aagttccttggagtcccgggaccaagatggcgacc	80.1	72**
pCEP4_L1_prom + XhoI + NcoI	tatctcgagctctagaagctgggtaccag	60.5	tatccatggctggtaatctctggagttagtag	60.9	62**
*Amplification with Expand Long Range DNTPack (Roche)
**Amplification with Q5 High-Fidelity 2x Master Mix (New England Biolabs)

## Sheet: L1 sequencing primers
Primer name	Primer sequence (5ʹ to 3ʹ)
mL1_AGT_End_498_F	agatraaaggatggaccatgtaga
mL1_AGT_End_364_R	gactgtgagcatccacttct
mL1_AGT_End_983_R	atatatgcccaggagaggtattg
mL1_AGT_End_1618_R	atgtgaagttccttgatccactta
mL1_AGT_End_2243_R	tgagaagggtgttgtttccctaa
mL1_AGT_End_2865_R	tcttggattcggttagcgagaat
mL1_AGT_End_3504_R	tcctgccgtctactcctctt
mL1_AGT_End_4088_R	gtctcccactattattgtgtgag
mL1_AGT_End_4659_R	gtcgtggaatactttggtttctc
mL1_AGT_End_5254_R	tcttgtattctgttgctgatgct
mL1_AGT_End_5663_R	cgtttrcctttcgccatctgg
mL1_Tf_End_5092_R	ggcccaaaacaggacctttc

## Sheet: Bisulfite sequencing primers
Target	Forward primer sequence (5ʹ to 3ʹ)	Tm (˚C)	Reverse primer sequence (5ʹ to 3ʹ)	Tm (˚C)	Annealing temperature (˚C)
L1_TfI/TfII_monomer	gttgaggtagtattttgtgtgggt	62	ttccaaaaactatcaaattctctaac	58.4	54
L1_TfIII_monomer	ggaaattagtttgaataggttagagggtg	66.2	tcctaaattccaaaaaatcctaaaaccaaa	62.6	54
L1_Gf_monomer	ggtttgagaggtttgtggtatag	60.9	tactctcaccaaaaaaataacc	54.7	54
L1_A_monomer	gggtttgatttggggtataagtt	59.2	ttccactcaccaaaaatcttaaaat	57.6	54
Insertion_2_prom	tttgagtattagaataatatattggtaaaa	58.5	aataaacacctatcctccratcc	59.2 - 60.9	54
Insertion_5_prom	tattgtttattttttttgagaaatagttaa	56.9	ttccaaaaactatcaaattctctaac	58.4	54
Insertion_7_prom	tttttttgatgattaaggatgttga	55.9	ttccaaaaactatcaaattctctaac	58.4	54
polyL1Tf_3_prom	tagtaaggttgtattttttagaggtttttt	61	aaaataacraccrctactactataacttaaa	61.9 - 64.3	52
polyL1Tf_4_prom	ttagtattagattttttaataaaaggaatg	58.5	ctactactataacttaaaccrcctcc	62.9 - 64.6	54
Donor_2_prom	tggttgtttggattaaggtaaaatta	58.4	aatcccaaaccaaaataacgacc	59.2	54
Donor_5_prom	tttttaaattttagaattaagattggttat	56.9	aaaataacraccrctactactataacttaaa	61.9 - 64.3	50
Donor_7_prom	tttgtttaagatgttaatataaggtt	55.2	ctttaacaattcccaaataataca	55	54
Donor_3_prom	tttttgaaatttttaaataataataaaaa	51.9	aaaataacraccrctactactataacttaaa	61.9 - 64.3	50
Donor_4_prom	ttgtatttaaaaatatttggaattttgtgt	58.6	ctcacctattcaaactaatttcctaaattc	63.9	54
Snrpn	aatttgtgtgatgtttgtaattatttgg	59.9	ataaaatacactttcactactaaaatcc	59.9	54

## Sheet: Bisulfite sequencing amplicons
Target	Unconverted amplicon sequence	Amplicon length
		(primers excluded)
L1_TfI/TfII_monomer	CGGGGACAGCCGGCCACCTTCCGGACCGGAGGACAGGTGCCCACCCGGCTGGGGAGGCGGCCTAAGCCACAGCAGCAGCGGTCGCCATCTTGGTCCGGGACCCGCCGAACTTAGGAAATTAGTCTGAACAGGTGAGAGGGTGC	143 bp
L1_TfIII_monomer	CGCCAGAGAACCGGACAGCTTCTGGGACGGGCAGAAGCACAGAGCCGCTGAGGCAGCAGCCTGGGCGGGCCGCAGACAACCGGCCACCATCCGGACCAGAGGACAGGTGTCCGCCTGGCTTGGGAGGCGGCCTCAGCCTCAGCAGCAGCGGTCGCCAT	158 bp
L1_Gf_monomer	GCGCCGGCGGGAGCCTTCTTGGCTCCGGGACTCCGCGGAGGGCAGGCTGCACGGGTGACCGTGTGGAATACAGAGTGCCAGCCGTTTCTGGGACGGGCGAGAGAGTCGCAGAGCTTCTGGGCGGCGCCATCTTAGCTCCAGACAGCCG	148 bp
L1_A_monomer	CCTTCCGCTCGACTCGAGACTCGAGCCCCGGGCTACCTTGCAGCAGAGTCTTGCCCAACACCCGCAAGGGCCCACACGGGACTCCCCACGGG	92 bp
Insertion_2_prom	CACTTCTGACACATCACCATATCTTTGTCTGCCCACCTCTGATGTTTCTCTCATCAGCATAGAAGCATTTATGCTAAAGTCCATACCTCATAGGAGGAGCGGGAGCAGGCCTTGATGTAGTTTGAAATTCTATTAAAAATTTTTTTCTCTCGGCTGGGGAGGCGACCTAAGCCACAGCAGCAGCGGTCGCCATCTTGGTCCGGGACCCGCCGAACTTAGGAAATTAGTCTGAACAGGGGAGAGGGTGCGCCAGAGAACCTGACAGCTTCTGGAACAGGCAGAAGCACAGAGGCGCTGAGGCAGCACCCTGTGTGGGCCGGGGACAGCCGGCCACCTTCC	339 bp
Insertion_5_prom	CTGAATTCCCACACTGGCTCTACTGGTTTATCATTCCACCAGTGGATGAGGGTTTGGTTTCCCTCACCCCCTTATCAGCATCCTTTCTCCTTTGTTTTCTTGGTAAAAGACATTCTGACACTTTTGTTTCACCTTGTTTGTCTTGTCGATACAGCTTATCACTATCTATGCCTGACTAGCCAGATCTCACTGTGAACATCAGGCTGGTCTTGAGTTTATAACAATTCTCTTGCCTGCCTCTGCTTCCTGAATACTATGATTCTAGGCATGCCACACAGATTTTGTACTATAGGAAAACAAAGAAAAAATACTTCAAGATATAAGCATATGGCAGATTTTTGTAAGATATCTTAGTAGACAAGAAAATAACAGCGGGGACAGCCGGCCACCTTCCGGACC…	515 bp
Insertion_7_prom	ACATTTTTTTAGGTGCTTCTCAGCTATTCGGTATTGAAGATGCTCCAACATGTAATAAGGACACATGCTCCATTACGTTCATAGCAGCCTTGTTTACAATAGCCAGAAGCGATCTTGGTCCGGGACCCGCCGAACTTAGGAAATTAGTCTGAACAGGTGAGAGGGTGCGCCAGAGAACCTGACAGCCTCTGGAACAGGCAGAAGCACAGAGGGGCTGAGGCAGCACCCTGTGTGGGCCGGGGACAGCCGGCCACCTTCCAAACCGGAGGACAGGTGCCCGCCCGGCTGGGGAGGCGGCCTAAGCCACAGCAGCAGCGGTCGCCATCTTGGTCCGAGACCCGCCGAACTTAGGAAATTAGTCTGAACAGGTGAGAGGGTGCG	381 bp
polyL1Tf_3_prom	AAACCCAGGCAACAGCCCCACTGTTCAAATACATGAGCCTTTGAGGGACATTTGTATTCAGAACACCTTTGAGCTTGGTGCTTCTGTAATCTTGAAGGATACTTGGCAGAAAGAGATGGTTTATGAGTAATGTCATAATAAGATGACAGACTCGACAGCAGCAGCGGTCGCCATCTTGGTCCGGGACCCGCCGAACTTAGGAAATTAGTCTGAACAGGTGAGAGGGTGCGCCAGAGAACCTGACAGCCTCTGGAACAGGCAGAAGCACAGAGGGGCTGAGGCAGCACCCTGTGTGGGCCGGGGACAGCCAGCCACCTTCCGGACCGGAGAACAGGTGCCCGCCCGGCTGGGGAGGCGA	358 bp
polyL1Tf_4_prom	TTAAGTAATTCCATAGGCAAACTATATTTGCAGTCAAATTTTAAATTAAATGGGGATATAGTTGAAAAAGAAAATACAGATCTTGGTCCGGGACCCGCCGAACTTAGGAAATTAGTCTGAACAGGTGAGAGGGTGCGCCAGAGAACCTGACAGCTTCTGGAACAGGCGGAAGCACAGAGGCGCTGAGGCAGCACCCTTTGTGGGTCGGGGACAGCCAGCCACCGTCCGGACCGGAGGACAGGTGCCCGTCCGGCTGG	257 bp
Donor_2_prom*	ATAGACTTCAAAGAGGTTTAAAAAGTGTATTTAACTCTCTAATTCTCATCAAAGCTAAAGGTGTTTTTTTCATCTGAAGTAGCCCTCCTCTAAAATGTATTGTGAGTTGGTCCGAGACCCGCCGAACTTAGGAAATTAGTCTGAACAGGTGAGAGGGTGCGCCAGAGAACCTGACAGCTTCTGGAACAGGCAGAAGCACAGAGGCGCTGAGGCAGCACCCTGTGTGGGCCGGGGACAGCCGGCCACCTTCCGGACCGGAGGACAGGTGCCCACCCAGCTGGGGAGGCGGCCTAAGCCACAGCAGCAGCGGTCGCCATCTTGGTCCGGGACCCGCCGAATTTAGGAAATTAGTCTGAACAGGTGAGAGGGTGCGCCAGAGAACCTGACAGCCTCTGGAAC…	795 bp
Donor_5_prom	ATCAGTCCAATATTTATCAGGACATAACTATTCAACTTCTAAGGATTAGAACTTTTTATCAGATCTTGGTCCGGGACCCGCCGAACTTAGGAAATTAGTCTGAACAGGTGAGAGGGTGCGCCAGAGAACCTGACAGCTTCTGGAACAGGCGGAAGCACAGAGGCGCTGAGGCAGCACCCTGTGTGGGCCGGGGACAGCCGGCCACCTTCCGGACCAGAGGACAGGTGCCCACCCGGCTGGGGAGGCGG	248 bp
Donor_7_prom	CGGCTGGGGAGGCGGCCTAAGCCACAGCAGCAGCGGTCGCCATCTTGGTCCGAGACCCGCCGAACTTAGGAAATTAGTCTGAACAGGTGAGAGGGTGCGCCAGAGAACCTGACAGCTTCTGGAACAGGCAGAGGCACAGAGGCGCTGAGGCAGCACCCTGTGTGGGCCGGGGACAGCCGGCCACCTTCCGGACCGGAGGACAGGTGCCCGCCCGGCTGGGGAGGCGACCTAAGCCACAGCAGCAGCGGTCGCCATCTTGGTCCGGGACCCGCCGAACTTAGGAAATTAGTCTGAACAGGTGAGAGGGTGCGCCAGAGAACCTGACAGCCTCTGGAACAGGCAGAAGCACAGAGGGGCTGAGGCAGCACCCTGTGTGGGCCGGGGACAGCCGGCCACCTT…	733 bp
Donor_3_prom	AGATTTCAACTTCCAGCAGACCTTACAAATGCAACAGTTGGAGGAAATTAGTCTGAACAGGTGAGAGGGTGCGCCAGAGAACCTGACAGCTTCTGGAACAGGCGGAAGCACAGAGGCGCTGAGGCAGCACCCTTTGTGGGCCGGGGACAGCCGGCCACCTTCCGGACCAGAGGACAGGTGCCCACCCGGCTGGGGAGGCGG	201 bp
Donor_4_prom	AAAATAAAAAATGTCGAGGTGAGAGGGTGCGCCAGAGAACCTGACAGTCTCTGGAACAGGCAGAAGCACAGAGGGGCTGAGGCAGCACCCTGTGTGGGCCGGGGACAGCCGGCCACCTTCCGGACCAGAGGACAGGTGCCCACCCGGCTGGGGAGGCGGCCTAAGCCACAGCAGCAGCGGTCGCCATCTTGGTCCGGGACCCGCC	205 bp
Snrpn	GAGCAATTTTTTTAAAAAATTAAATGTATTTAGTAATAGGCAATTATATCCATTATTCCAGATTGACAGTGATTTTTTTTTAAATACACGCTCAAATTTCCGCAGTAGGAATGCTCAAGCATTCCTTTTGGTAGCTGCCTTTTGGCAGGACATTCCGGTCAGAGGGACAGAGACCCCTGCATTGCGGCAAAAATGTGCGCATGTGCAGCCATTGCCTGGGACGCATGCGTAGGGAGCCGCGCGACAAACCTGAGCCATTGCGGCAAGACTAGCGCAGAGAGGAGAGGGAGCCGGAGATGCCAGACGCTTGGTTCTGAGGAGTGATTTGCAACGCAATGGAGCGAGGAAGGTCAGCTGGGCTTGT	364 bp

## Sheet: PromethION sequencing stats
PromethION (Oxford Nanopore Technologies) sequencing statistics for samples from three mESC differentiation time points (mESCs_d0, EBs_d3 and differentiated _d21).
Sample Type	Sample Name	Sample ID	Flowcell ID	Yield (Gbp)	N50 (Kbp)
undifferentiated mESCs in serum+LIF	mESCs_d0	PLPN052962	PAE51561	65.3 Gb	11.86 Kb
embryoid bodies on day 3 of suspension culture	EBs_d3	PLPN053962	PAE70618	59.47 Gb	10.23 Kb
completely differentiated cells on day 21	differentiated_d21	PLPN054962-3	PAE49950	41.38 Gb	9.41 Kb

## Sheet: L1 5,4,3,2 monomer consensus
Consensus sequences for L1TF elements with 5, 4, 3, and 2 monomers used for analyses
5 monomer L1 consensus	TCTTGGTCCGGGACCCGCCGAACTTAGGAAATTAGTCTGAACAGGTGAGAGGGTGCGCCAGAGAACCTGACAGCTTCTGGAACAGGCGGAAGCACAGAGGCGCTGAGGCAGCACCCTGTGTGGGCCGGGGACAGCCGGCCACCTTCCGGACCAGAGGACAGGTGCCCGCCCGGCTGGGGAGGCGGCCTAAGCCACAGCAGCAGCGGTCGCCATCTTGGTCCGGGACCCGCCGAACTTAGGAAATTAGTCTGAACAGGTGAGAGGGTGCGCCAGAGAACCTGACAGCTTCTGGAACAGGCGGAAGCACAGAGGCGCTGAGGCAGCACCCTGTGTGGGCCGGGGACAGCCGGCCACCTTCCGGACCAGAGGACAGGTGCCCGCCCGGCTGGGGAGGCGACC…
4 monomer L1 consensus	TTGGTCCGGGACCCGCCGAACTTAGGAAATTAGTCTGAACAGGTGAGAGGGTGCGCCAGAGAACCTGACAGCCTCTGGAACAGGCAGAAGCACAGAGGGGCTGAGGCAGCACCCTGTGTGGGCCGGGGACAGCCGGCCACCTTCCGGACCGGAGGACAGGTGCCCGCCCGGCTGGGGAGGCGACCTAAGCCACAGCAGCAGCGGTCGCCATCTTGGTCCGGGACCCGCCGAACTTAGGAAATTAGTCTGAACAGGTGAGAGGGTGCGCCAGAGAACCTGACAGCTTCTGGAACAGGCGGAAGCACAGAGGCGCTGAGGCAGCACCCTGCGTGGGCCGGGGACAGCCGGCCACCTTCCGGACCAGAGGACAGGTGCCCACCCGGCTGGGGAGGCGGCCTA…
3 monomer L1 consensus	TCGCCATCTTGGTCCGGGACCCACCGAACTTAGGAAATTAGTCTGAACAGGTGAGAGGGTGCGCCAGAGAACCTGACAGCTTCTGGAACAGGCGGAAGCACAGAGGCGCTGAGGCAGCACCCTGTGTGGGCCGGGGACAGCCGGCCACCTTCCGGACCAGAGGACAGGTGCCCACCCGGCTGGGGAGGCGGCCTAAGCCACAGCAGCAGCGGTCGCCATCTTGGTCCGGGACCCGCCGAACTTAGGAAATTAGTCTGAACAGGTGAGAGGGTGCGCCAGAGAACCTGACAGCTTCTGGAACAGGCAGAAGCACAGAGGCGCTGAGGCAGCACCCTGTGTGGGCCGGGGACAGCCGGCCACCTTCCGGACCAGAGGACAGGTGCCCACCCGGCTGGGGAG…
2 monomer L1 consensus	GAGGCGGCCTAAGCCACAGCAGCAGCGGTCGCCATCTTGGTCCGGGACCCGCCGAACTTAGGAAATTAGTCTGAACAGGTGAGAGGGTGCGCCAGAGAACCTGACAGCTTCTGGAACAGGCAGAAGCACAGAGGCGCTGAGGCAGCACCCTGTGTGGGCCGGGGACAGCCGGCCACCTTCCGGACCAGAGGACAGGTGCCCGCCCGGCTGGGGAGGCGACCTAAGCCACAGCAGCAGCGGTCGCCATCTTGGTCCCGGGACTCCAAGGAACTTAGGAATTTAGTCTGCTTAGGTGAGAGTCTGTACCACCTGGGAACTGCCAAAGCAACACAGTGTCTGAGAAAGGTCCTGTTTTGGGCCTTCTTCTTCGGCCAGGAGGAGGTCCAAATACAAGATATC…
