# Supplementary material for: Locus-resolution analysis of L1 regulation and retrotransposition potential in mouse embryonic development
Source: HighWire-hosted journal article supplement (doi:10.1101/gr.278003.123), 2023-09-01
Supplement: Supplemental_Fig_S2.pdf [file Supplemental_Fig_S2.pdf]

# Supplemental Figure S2

A

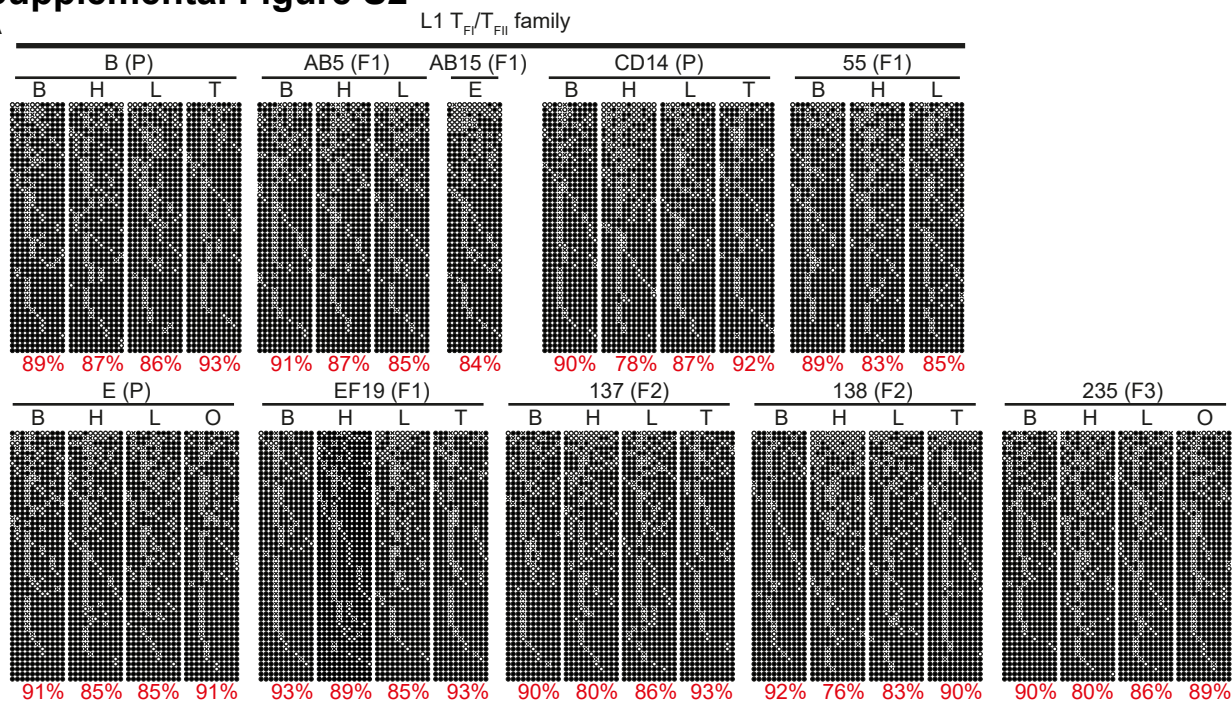

B

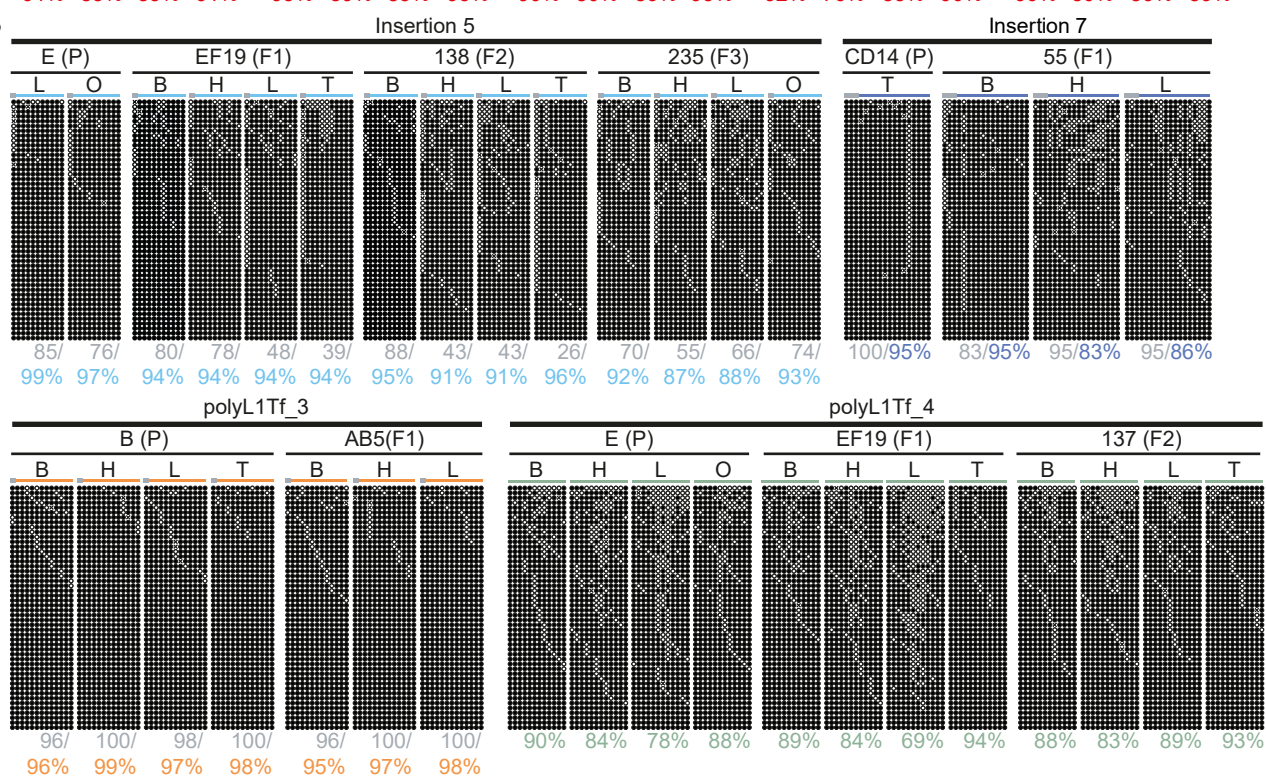

C

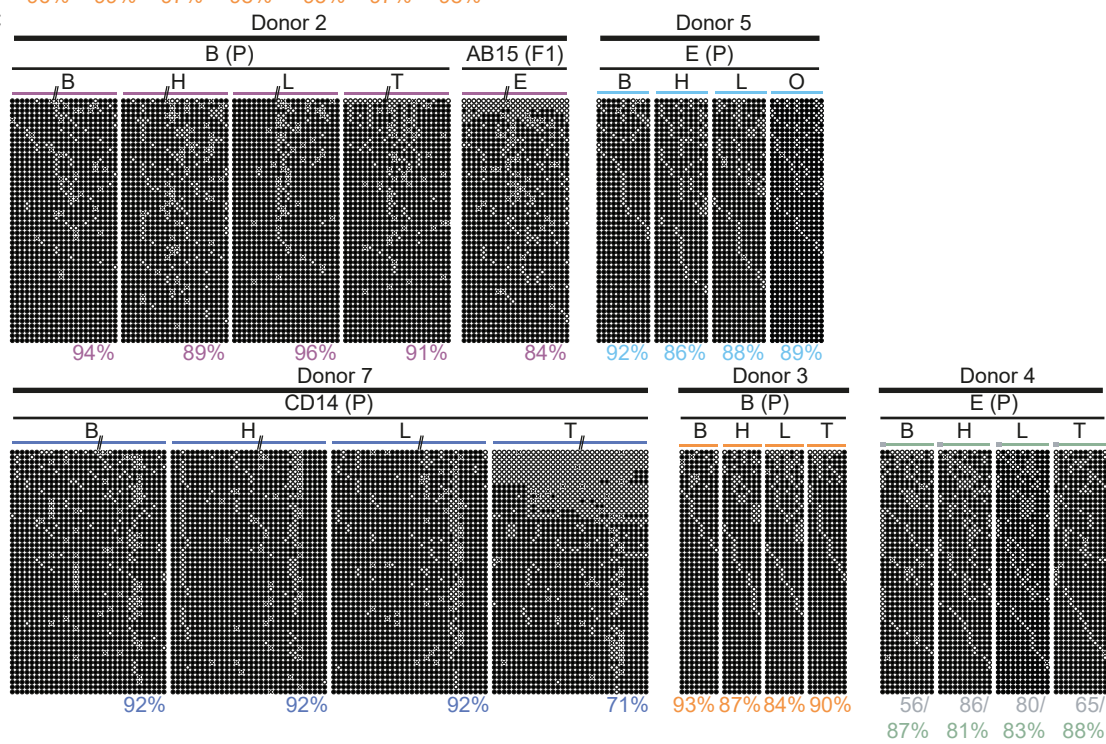

**Supplemental Figure S2. Methylation of L1 T<sub>FI</sub>/ T<sub>FII</sub> family and L1 donor/daughter pairs in mouse tissues.**

(A) Genome-wide methylation level of CpG dinucleotides of L1 T<sub>FI</sub>/ T<sub>FII</sub> promoter sequence is shown. Displayed are 50 non-identical sequences extracted at random from a much larger pool of available Illumina reads. Each cartoon panel corresponds to an amplicon (black circle, methylated CpG; white circle, unmethylated CpG; ×, mutated CpG). The overall percentage of methylated CpG dinucleotides is indicated below each cartoon.

(B) As for (A) except for methylation level of CpG dinucleotides of L1 daughter insertions is shown. Colored line above the cartoon represents amplicon (grey, genomic sequence; colored, L1 sequence). Grey letters indicate overall percentage of methylated CpG dinucleotides in genomic sequence. Colored letters indicate methylation of CpG dinucleotides in L1 sequence.

(C) As for (A) and (B) but for donor L1s. The promoters of Donor 2 and Donor 7 were not completely sequenced and missing the center monomer as indicated by black lines in colored line above methylation cartoons.
